# Supplementary material for: Keeping water from kiosks clean: Strategies for reducing recontamination during transport and storage in Eastern Uganda
Source: PubMed Central journal article supplement — Water Res X. 2020 Dec 5;10:100079. doi: 10.1016/j.wroa.2020.100079 (PMC7750645; doi:10.1016/j.wroa.2020.100079), 2020-12-05
Supplement: mmc1.pdf [file mmc1.pdf]

Supplementary Table A Demographics, access to water, water handling and hygiene in 3 intervention sites

|                                                                                                                                                                  | Lugala control (n=43) |                 |                | Bulundira chlorinated at kiosk (n=46) |                 |                | Bumeru chlorinated at kiosk & cleaned jerrycan or cleaned improved container (n=46) |                 |                | $\chi^2$ -test of independence | Pearson's R | Spearman's Rho |
|------------------------------------------------------------------------------------------------------------------------------------------------------------------|-----------------------|-----------------|----------------|---------------------------------------|-----------------|----------------|-------------------------------------------------------------------------------------|-----------------|----------------|--------------------------------|-------------|----------------|
|                                                                                                                                                                  | N                     | Mean/percentage | Std. Deviation | N                                     | Mean/percentage | Std. Deviation | N                                                                                   | Mean/percentage | Std. Deviation |                                |             |                |
| Wealth Index                                                                                                                                                     | 43                    | 36.50           | 22.03          | 46                                    | 32.63           | 24.34          | 46                                                                                  | 31.83           | 21.51          | $p=0.335$                      | $p=0.274$   |                |
| Education                                                                                                                                                        | 43                    | 1.05            | 0.62           | 46                                    | 0.98            | 0.49           | 46                                                                                  | 1.04            | 0.56           | $p=0.990$                      | $p=0.989$   |                |
| Employment of interviewee                                                                                                                                        |                       |                 |                |                                       |                 |                |                                                                                     |                 |                |                                |             |                |
| Agriculture                                                                                                                                                      | 43                    | 0.93            |                | 46                                    | 0.96            |                | 46                                                                                  | 0.98            |                | $p=0.546$                      |             |                |
| Small Business                                                                                                                                                   | 43                    | 0.02            |                | 46                                    | 0.02            |                | 46                                                                                  | 0.02            |                | $p=0.998$                      |             |                |
| Daily Laborer                                                                                                                                                    | 43                    | 0.00            |                | 46                                    | 0.07            |                | 46                                                                                  | 0.02            |                | $p=0.179$                      |             |                |
| Government service                                                                                                                                               | 43                    | 0.02            |                | 46                                    | 0.00            |                | 46                                                                                  | 0.00            |                | $p=0.340$                      |             |                |
| Other Independent Work                                                                                                                                           | 43                    | 0.02            |                | 46                                    | 0.00            |                | 46                                                                                  | 0.02            |                | $p=0.591$                      |             |                |
| Distance (m) to the kiosk from your home                                                                                                                         | 43                    | 408.37          | 357.45         | 46                                    | 758.48          | 324.49         | 46                                                                                  | 626.30          | 433.58         | $p=0.012$                      | $p=0.016$   |                |
| Kiosk is main drinking water source                                                                                                                              | 43                    | 0.98            |                | 46                                    | 0.98            |                | 46                                                                                  | 0.96            |                | $p=0.792$                      |             |                |
| Additional use of other water source (yes/no)                                                                                                                    | 43                    | 0.14            |                | 46                                    | 0.50            |                | 46                                                                                  | 0.35            |                | $p=0.001$                      |             |                |
| Type of other water source used                                                                                                                                  |                       |                 |                |                                       |                 |                |                                                                                     |                 |                |                                |             |                |
| Rainwater Harvesting                                                                                                                                             | 43                    | 0.05            |                | 46                                    | 0.00            |                | 46                                                                                  | 0.07            |                | $p=0.234$                      |             |                |
| Borehole                                                                                                                                                         | 43                    | 0.02            |                | 46                                    | 0.17            |                | 46                                                                                  | 0.00            |                | $p=0.001$                      |             |                |
| Open dug well/ pond                                                                                                                                              | 43                    | 0.00            |                | 46                                    | 0.02            |                | 46                                                                                  | 0.00            |                | $p=0.377$                      |             |                |
| Lake                                                                                                                                                             | 43                    | 0.07            |                | 46                                    | 0.35            |                | 46                                                                                  | 0.28            |                | $p=0.006$                      |             |                |
| Use of household water treatment                                                                                                                                 | 43                    | 0.12            |                | 46                                    | 0.07            |                | 46                                                                                  | 0.15            |                | $p=0.411$                      |             |                |
| Method available/practiced in HH for water treatment (observation)                                                                                               |                       |                 |                |                                       |                 |                |                                                                                     |                 |                |                                |             |                |
| Boiling                                                                                                                                                          | 43                    | 0.02            |                | 46                                    | 0.00            |                | 46                                                                                  | 0.07            |                | $p=0.175$                      |             |                |
| Flocculation & Sedimentation                                                                                                                                     | 43                    | 0.00            |                | 46                                    | 0.00            |                | 46                                                                                  | 0.00            |                |                                |             |                |
| Chlorination                                                                                                                                                     | 43                    | 0.02            |                | 46                                    | 0.04            |                | 46                                                                                  | 0.00            |                | $p=0.367$                      |             |                |
| Solar Disinfection                                                                                                                                               | 43                    | 0.00            |                | 46                                    | 0.00            |                | 46                                                                                  | 0.00            |                |                                |             |                |
| Ceramic Water Filter                                                                                                                                             | 43                    | 0.02            |                | 46                                    | 0.02            |                | 46                                                                                  | 0.04            |                | $p=0.792$                      |             |                |
| Frequency cleaning transport container at home<br><i>0=never, 1=less than once per week, 2=once per week, 3=every third day, 4=every second day, 5=every day</i> | 43                    | 3.19            | 1.16           | 46                                    | 3.76            | 0.97           | 46                                                                                  | 3.41            | 1.26           | $p=0.377$                      | $p=0.541$   |                |
| Materials used to clean the water transport container at home                                                                                                    |                       |                 |                |                                       |                 |                |                                                                                     |                 |                |                                |             |                |
| Soap                                                                                                                                                             | 43                    | 0.40            |                | 46                                    | 0.65            |                | 46                                                                                  | 0.83            |                | $p<0.000$                      |             |                |
| Sometimes Chlorine                                                                                                                                               | 43                    | 0.00            |                | 46                                    | 0.00            |                | 46                                                                                  | 0.00            |                |                                |             |                |
| Always Chlorine                                                                                                                                                  | 43                    | 0.00            |                | 46                                    | 0.00            |                | 46                                                                                  | 0.00            |                |                                |             |                |
| Lantanakamara leaves                                                                                                                                             | 43                    | 0.16            |                | 46                                    | 0.26            |                | 46                                                                                  | 0.17            |                | $p=0.441$                      |             |                |
| Sponge                                                                                                                                                           | 43                    | 0.63            |                | 46                                    | 0.52            |                | 46                                                                                  | 0.74            |                | $p=0.097$                      |             |                |
| Cloth                                                                                                                                                            | 43                    | 0.00            |                | 46                                    | 0.00            |                | 46                                                                                  | 0.00            |                |                                |             |                |
| Sand                                                                                                                                                             | 43                    | 0.70            |                | 46                                    | 0.46            |                | 46                                                                                  | 0.28            |                | $p<0.000$                      |             |                |
| Received HH Visit for WASH training                                                                                                                              | 43                    | 0.63            |                | 46                                    | 0.33            |                | 46                                                                                  | 0.24            |                | $p=0.000$                      |             |                |
| Number HH Visits ( <i>among those having received a visit</i> )                                                                                                  | 27                    | 2.33            | 2.02           | 15                                    | 2.40            | 1.55           | 11                                                                                  | 1.73            | 0.65           | $p=0.393$                      | $p=0.853$   |                |
| Participated in Community Meeting for WASH training                                                                                                              | 43                    | 0.44            |                | 46                                    | 0.54            |                | 46                                                                                  | 0.37            |                | $p=0.242$                      |             |                |
| Number of Community Meetings ( <i>among those having received a visit</i> )                                                                                      | 19                    | 2.32            | 1.49           | 25                                    | 2.60            | 2.65           | 17                                                                                  | 1.88            | 0.86           | $p=0.530$                      | $p=0.479$   |                |
| How many children had diarrhoea in the past 7 days?                                                                                                              | 43                    | 0.37            | 0.72           | 46                                    | 0.24            | 0.52           | 46                                                                                  | 0.30            | 0.63           | $p=0.624$                      | $p=0.787$   |                |
| How many children had a respiratory disease in the past 7 days?                                                                                                  | 43                    | 0.67            | 0.94           | 46                                    | 0.57            | 0.89           | 46                                                                                  | 0.72            | 0.91           | $p=0.812$                      | $p=0.663$   |                |
| Toilet                                                                                                                                                           |                       |                 |                |                                       |                 |                |                                                                                     |                 |                |                                |             |                |
| No Toilet                                                                                                                                                        | 43                    | 0.16            |                | 46                                    | 0.07            |                | 46                                                                                  | 0.13            |                | $p=0.346$                      |             |                |
| Shared Toilet                                                                                                                                                    | 43                    | 0.23            |                | 46                                    | 0.39            |                | 46                                                                                  | 0.24            |                | $p=0.168$                      |             |                |
| Pit Latrine                                                                                                                                                      | 43                    | 0.56            |                | 46                                    | 0.54            |                | 46                                                                                  | 0.59            |                | $p=0.913$                      |             |                |
| VIP Latrine                                                                                                                                                      | 43                    | 0.05            |                | 46                                    | 0.00            |                | 46                                                                                  | 0.04            |                | $p=0.343$                      |             |                |
| Toilet is clean (vs dirty)                                                                                                                                       | 43                    | 0.40            |                | 46                                    | 0.33            |                | 46                                                                                  | 0.17            |                | $p=0.063$                      |             |                |
| Toilet index                                                                                                                                                     | 43                    | 1.88            | 1.07           | 46                                    | 1.80            | 0.81           | 46                                                                                  | 1.72            | 0.96           | $p=0.408$                      | $p=0.290$   |                |
| Frequency of handwashing with soap yesterday                                                                                                                     | 43                    | 3.74            | 2.55           | 46                                    | 3.30            | 2.09           | 46                                                                                  | 2.61            | 1.26           | $p=0.009$                      | $p=0.017$   |                |
| Handwashing infrastructure                                                                                                                                       |                       |                 |                |                                       |                 |                |                                                                                     |                 |                |                                |             |                |
| No Handwashing facilities                                                                                                                                        | 43                    | 0.67            |                | 46                                    | 0.70            |                | 46                                                                                  | 0.93            |                | $p=0.005$                      |             |                |
| Handwashing facility available                                                                                                                                   | 43                    | 0.33            |                | 46                                    | 0.31            |                | 46                                                                                  | 0.07            |                | $p=0.005$                      |             |                |
| Tippy Taps                                                                                                                                                       | 43                    | 0.19            |                | 46                                    | 0.15            |                | 46                                                                                  | 0.02            |                | $p=0.039$                      |             |                |
| Container with Tap                                                                                                                                               | 43                    | 0.02            |                | 46                                    | 0.00            |                | 46                                                                                  | 0.00            |                | $p=0.340$                      |             |                |
| Jerrycan with Water                                                                                                                                              | 43                    | 0.12            |                | 46                                    | 0.15            |                | 46                                                                                  | 0.04            |                | $p=0.220$                      |             |                |
| Handwashing facility with soap and water available                                                                                                               | 43                    | 0.09            |                | 46                                    | 0.13            |                | 46                                                                                  | 0.00            |                | $p=0.049$                      |             |                |
| Condition handwashing facilities ( <i>percentage of those with handwashing facility</i> )                                                                        |                       |                 |                |                                       |                 |                |                                                                                     |                 |                |                                |             |                |
| Handwashing facility damaged                                                                                                                                     | 14                    | 0.71            |                | 14                                    | 0.50            |                | 3                                                                                   | 0.67            |                | $p=0.498$                      |             |                |
| Handwashing Clean                                                                                                                                                | 14                    | 0.07            |                | 14                                    | 0.29            |                | 3                                                                                   | 0.33            |                | $p=0.290$                      |             |                |
| Soap Available                                                                                                                                                   | 14                    | 0.29            |                | 14                                    | 0.43            |                | 3                                                                                   | 0.00            |                | $p=0.327$                      |             |                |
| Handwashing Water Available                                                                                                                                      | 14                    | 0.79            |                | 14                                    | 0.86            |                | 3                                                                                   | 1.00            |                | $p=0.637$                      |             |                |
| Handwashing Facility Index                                                                                                                                       | 43                    | 17.09           | 28.27          | 46                                    | 17.61           | 31.20          | 46                                                                                  | 3.59            | 14.49          | $p=0.014$                      | $p=0.004$   |                |
